# Supplementary material for: Integrative proteomic characterization of adenocarcinoma of esophagogastric junction
Source: PubMed Central journal article supplement (PMC9922290; doi:10.1038/s41467-023-36462-8), 2023-02-11
Supplement: 41467_2023_36462_MOESM3_ESM.pdf [file 41467_2023_36462_MOESM3_ESM.pdf]

## Description of Additional Supplementary Files

File Name: Supplementary Data 1

Description: Major clinical information of 103 AEG patients in this study.

File Name: Supplementary Data 2

Description: . SNVs across 94 AEG patients.

File Name: Supplementary Data 3

Description: Differentially expressed proteins in AEG

File Name: Supplementary Data 4

Description: Druggable Differential proteins.

File Name: Supplementary Data 5

Description: The degree, closeness, and betweenness of proteins in the differentially expressed protein PPI network.

File Name: Supplementary Data 6

Description: Subtyping information of 103 AEG tumor samples.

File Name: Supplementary Data 7

Description: Subtype-specific mutation genes.

File Name: Supplementary Data 8

Description: Significant mutation-to-protein associations in each subtype.

File Name: Supplementary Data 9

Description: The association between FBXO44 protein level and clinicopathological features of AEG patients.

File Name: Supplementary Data 10

Description: Differential phosphorylation sites in all AEG tumor and NAT samples.

File Name: Supplementary Data 11

Description: Differential phosphorylated sites in each AEG proteomic subtype.

File Name: Supplementary Data 12

Description: Correlations between known kinase-phosphosubstrate pairs.

File Name: Supplementary Data 13

Description: Protein group intensities across 103 AEG tumor samples and paired non-tumor samples.

File Name: Supplementary Data 14

Description: Gene counts across 85 AEG tumor samples and paired non-tumor samples.

File Name: Supplementary Data 15

Description: The scores and p values of different cell types generated from the xCell method.
